# Supplementary material
Source: Research Square preprint supplement (doi:10.21203/rs.3.rs-8750263/v1)
Supplement: Supplementary file 1 [file 14cc3d34d850e4ec869646ce.docx]

**Figure S1.** Distribution of Spontaneous and Iatrogenic Preterm Births

*Abbreviations.* PTB-=preterm birth, s PTB =spontaneous preterm birth, i PTB= iatrogenic preterm birth, PROM = premature rupture of membranes.

**Table S1.** Indications for Iatrogenic Preterm Birth

| Indications | Abs. | % |
| --- | --- | --- |
| Severe preeclampsia | 139 | 33,7% |
| Distress | 117 | 28,4% |
| Premature abruption of a normally located placenta | 46 | 11,2% |
| Placenta previa | 44 | 10,7% |
| Threat of uterine rupture | 22 | 5,3% |
| Antenatal fetal death | 16 | 3,9% |
| Acute polyhydramnios | 12 | 2,9% |
| Monochorionic twins | 9 | 2,2% |
| Hemolytic disease of the fetus | 3 | 0,7% |
| Extragenital pathology | 2 | 0,4% |
| Symphysiopathy | 1 | 0,2% |
| Anhydramnios | 1 | 0,2% |

*Abbreviations. Abs. =*Absolute number

**Table S2.** Degree of Prematurity in Spontaneous and Iatrogenic Preterm Births

| Degree of Prematurity | SPB (n=588) | | IPB (n=412) | | Total (n=1000) | | Р-value |
| --- | --- | --- | --- | --- | --- | --- | --- |
| Abs. | % | Abs. | % | Abs. | % | 0.64 |
| Extremely Preterm  (22-27 weeks) | 56 | 9,5 | 41 | 10 | 97 | 9,7 |
| Very Preterm  (28-32 weeks) | 79 | 13,4 | 76 | 18,2 | 155 | 15,5 |
| Moderately Preterm  (33-36 weeks) | 453 | 77 | 295 | 71,6 | 748 | 74,8 |

Note. Р-value was calculated using **Pearson's χ2 test**.

**Abbreviations: SPB**=Spontaneous Preterm Birth, **IPB**=iatrogenic Preterm Birth, Abs.=Absolute number.

**Table S3.** Perinatal Morbidity Comparison in SPB and IPB Groups

| Pathology | SPB *(n=588)* | | IPB *(n=412)* | | P-value |
| --- | --- | --- | --- | --- | --- |
| Abs. | % | Abs. | % |
| Cerebral Ischemia | 108 | 18,4 | 76 | 18,4 | 0,97 |
| Cerebral Depression | 440 | 74,8 | 305 | 74,0 | 0,77 |
| Intraventricular Hemorrhage | 68 | 11,6 | 57 | 13,8 | 0,28 |
| Respiratory Distress Syndrome | 74 | 12,6 | 65 | 15,8 | 0,15 |
| Congenital Pneumonia | 88 | 15,0 | 71 | 17,2 | 0,33 |
| Bronchopulmonary Dysplasia | 8 | 1,4 | 12 | 2,9 | 0,09 |
| Transient Tachypnea | 21 | 3,6 | 21 | 5,1 | 0,24 |
| Primary Atelectasis | 44 | 7,5 | 44 | 10,7 | 0,08 |
| DIC Syndrome | 34 | 5,8 | 34 | 8,3 | 0,13 |
| Gastrointestinal Hemorrhage | 23 | 3,9 | 17 | 4,1 | 0,86 |
| Necrotizing Enterocolitis | 15 | 2,6 | 15 | 3,6 | 0,32 |

Note. Р-value was calculated using Pearson's χ2 test or Fisher's exact test, depending on the minimum expected count in the contingency tables.

**Abbreviations: SPB**=Spontaneous Preterm Birth, **IPB**=atrogenic Preterm Birth, Abs.=Absolute number.

**Table S4.** Perinatal Mortality by Groups

| Mortality | SPB  *(n=588)* | | IPB  *(n=412)* | | P-value |
| --- | --- | --- | --- | --- | --- |
| Abs. | % | Abs. | % |
| Early Neonatal Mortality | 10 | 1,7 | 8 | 1,9 | 1.0 |
| Late Neonatal Mortality | 7 | 1,2 | 6 | 1,5 |

Note. Р-value was calculated using Pearson's χ2 test or Fisher's exact test, depending on the minimum expected count in the contingency tables.

**Abbreviations: SPB**=Spontaneous Preterm Birth, **IPB**=iatrogenic Preterm Birth, Abs.=Absolute number.
